# 1        **Chronic exposure to a neonicotinoid pesticide and a** 2        **synthetic pyrethroid in full-sized honey bee colonies**

3                                Richard ODEMER<sup>1</sup>, Peter ROSENKRANZ<sup>1</sup>

4                                <sup>1</sup>University of Hohenheim, Apicultural State Institute, 70593 Stuttgart, Germany

5  
6        \*Corresponding Author: richard.odemer@uni-hohenheim.de

7        phone: +49 1575 1 302 602

8        Keywords: neonicotinoid; thiacloprid; pyrethroid;  $\tau$ -fluvalinate; honey bees; population  
9        dynamics; overwintering success; colony level

## 10        **ACKNOWLEDGEMENTS**

11        We appreciate the support of the LAB staff for helping with the artificial swarms and colony  
12        assessments. This work was supported by the 7<sup>th</sup> Framework EU Programme Grant “BEE  
13        DOC” under Grant number 244956 CP-FP.

## 14        **ABSTRACT**

15        In the last decade, the use of neonicotinoid insecticides increased significantly in the  
16        agricultural landscape and meanwhile considered a risk to honey bees. Besides the exposure  
17        to pesticides, colonies are treated frequently with various acaricides that beekeepers are forced  
18        to use against the parasitic mite *Varroa destructor*. Here we have analyzed the impact of a  
19        chronic exposure to sublethal concentrations of the common neonicotinoid thiacloprid (T) and  
20        the widely used acaricide  $\tau$ -fluvalinate (synthetic pyrethroid, F) - applied alone or in  
21        combination - to honey bee colonies under field conditions. The population dynamics of bees  
22        and brood were assessed in all colonies according to the Liebefeld method. Four groups (T, F,  
23        F+T, control) with 8-9 colonies each were analyzed in two independent replications, each  
24        lasting from spring/summer until spring of the consecutive year. In late autumn, all colonies  
25        were treated with oxalic acid against Varroosis. We could not find a negative impact of the  
26        chronic neonicotinoid exposure on the population dynamics or overwintering success of the  
27        colonies, irrespective of whether applied alone or in combination with  $\tau$ -fluvalinate. This is in  
28        contrast to some results obtained from individually treated bees under laboratory conditions  
29        and confirms again an effective buffering capacity of the honey bee colony as a

30 superorganism. Yet, the underlying mechanisms for this social resilience remain to be fully  
31 understood.

32

## 33 **1 INTRODUCTION**

34 Neonicotinoid pesticides are among the most used insecticides during the past decades and are  
35 dominating the global market for insecticidal seed dressings (Jeschke et al., 2011; Simon-  
36 Delso et al., 2015). However, these neonicotinoids are suspected to be a main driver for the  
37 decline of honey bees (Hopwood et al., 2016), wild bees (Potts et al., 2010) and even non-  
38 target wildlife in general (Goulson, 2013). Recently, the European Food Safety Authority  
39 (EFSA) has updated their risk assessment and now considers the three neonicotinoids  
40 imidacloprid, clothianidin and thiametoxam to be “a risk for bees” and suggested suitable  
41 amendments to the European Commission (EFSA, 2018). These three nitro-substituted  
42 compounds have the highest toxicity to bees among the class of neonicotinoids (Iwasa et al.,  
43 2004) and have been already banned for the use in flowering crops by the European Union  
44 since the year 2014 (EFSA, 2013).

45 However, other neonicotinoid insecticides with a far lower toxicity to bees - for instance  
46 thiacloprid and acetamiprid - are still widely used not only as seed dressings but are even  
47 approved as foliar spray in blooming cultures like oilseed rape (Schmuck et al., 2003). This  
48 leads to a remarkable high contamination of nectar and pollen and foragers might therefore be  
49 continuously exposed to these agents (Genersch et al., 2010; Collison et al., 2016; Rolke et  
50 al., 2016; Böhme et al., 2017). There is no doubt about the comparable low acute toxicity of  
51 these compounds to bees, however there is a controversial discussion on sublethal and long-  
52 term effects. So, it has been shown that thiacloprid can affect the sensitivity of honey bees to  
53 the gut parasite *Nosema ceranae* (Vidau et al., 2011; Pettis et al., 2013; Retschnig et al.,  
54 2015). More recent publications indicate that sublethal concentrations of thiacloprid alter their  
55 social behavior (Forfert and Moritz 2017) and, more importantly, disturb the orientation of  
56 foragers (Fischer et al., 2014; Tison et al., 2016, 2017). These studies have been conducted on  
57 the level of individual or small groups of bees by performing cage tests or semi-field trials  
58 under rather artificial conditions. Therefore, they do not cover important attributes of a social  
59 entity, with a more complex perception to its environment. Hence, the transfer of these results  
60 to field conditions must be taken with caution. Significantly, the only field study available so  
61 far could not confirm negative effects of thiacloprid at the colony level (Siede et al., 2017).

62 Another controversial point is the possible interaction of thiacloprid - considered as “non-  
63 toxic for bees” - with active compounds of other chemical classes that are applied by  
64 beekeepers to control the parasitic mite *Varroa destructor*, requiring multiple annual  
65 treatments (Rosenkranz et al., 2010). In an effective and easy to use application, synthetic  
66 pyrethroids were, amongst others, introduced to beekeepers (Watkins, 1997) and are besides  
67 the formamidine amitraz the most frequently used acaricides in apiculture (Garrido et al.,  
68 2016). The exposure of honey bee colonies to a combination of sublethal doses of such  
69 pesticides may increase the susceptibility to pathogens and are suspected to contribute to the  
70 worldwide health problems of honey bee colonies (Cornman et al., 2013; Matsumoto, 2013;  
71 Wu et al., 2012). To study such possible combination effects we have chronically exposed  
72 full-sized colonies to the neonicotinoid thiacloprid and the synthetic pyrethroid  $\tau$ -fluvalinate  
73 (Apistan<sup>®</sup>) in a two-year field study. To our knowledge this is the first study that analyzes the  
74 effect of a chronic application of both, a neonicotinoid insecticide and a common acaricide  
75 under realistic field conditions at the colony level. An exposure to these two pesticides is very  
76 likely under common beekeeping conditions in rural areas. Our crucial endpoints were (i) the  
77 overwintering success of treated colonies compared to untreated controls and (ii) the colony  
78 population dynamics.

## 79 **2 MATERIALS & METHODS**

### 80 **2.1 Experimental colonies**

81 For each treatment group, five experimental colonies were established in early May of the  
82 year 2010. The experiment was repeated with three to four new colonies per group in the year  
83 2011 (Tab. 1). All colonies were set up at our local apiary at the agricultural experimental  
84 station Kleinhohenheim, which is an organic farming facility not using any agro chemicals or  
85 common pesticides at all. To standardize our experiment, we used artificial swarms made  
86 from stock colonies that were screened for low *Varroa* infestation and lack of virus infections  
87 prior to the trials. Freshly reared and mated sister queens of the Hohenheim breeding line  
88 were provided to each swarm, respectively. After the colonies successfully showed the first  
89 open brood stages, we sprayed all of them with a 3.5 % oxalic acid sugar solution for *Varroa*  
90 treatment to have a comparable low mite infestation for all experimental groups at the start of  
91 the experiment. We used residue free beeswax foundations to minimize the risk of additional  
92 contamination through pesticide residues in the wax (Bogdanov et al., 1998; Wallner, 1999).

93 All colonies were set up on one box of 10 Zander frames, which was extended to two boxes  
 94 when necessary during the summer season.

95  
 96 **Tab. 1:** List of replications, treatment groups, treatment duration, assessment dates (AD) and no. of colonies (N)  
 97 at the time of the assessment.

| Year      | Treatment   | Duration [days] | AD 1)   | N | AD 2)   | N | AD 3)   | N | Winter treatment | N | AD 4)   | N |
|-----------|-------------|-----------------|---------|---|---------|---|---------|---|------------------|---|---------|---|
| 2010-2011 | Control     | 56              | 23. Jul | 5 | 16. Aug | 5 | 8. Oct  | 5 | 30. Nov          | 4 | 15. Apr | 4 |
|           | Thiacloprid |                 |         | 5 |         | 5 |         | 5 |                  | 3 |         | 3 |
|           | Fluvalinate |                 |         | 5 |         | 5 |         | 5 |                  | 5 |         | 5 |
|           | Flu + Thia  |                 |         | 5 |         | 5 |         | 5 |                  | 4 |         | 4 |
| 2011-2012 | Control     | 62              | 21. Apr | 3 | 5. Aug  | 3 | 13. Oct | 3 | 29. Dec          | 3 | 3. Apr  | 2 |
|           | Thiacloprid |                 |         | 4 |         | 4 |         | 4 |                  | 4 |         | 4 |
|           | Fluvalinate |                 |         | 3 |         | 3 |         | 3 |                  | 3 |         | 3 |
|           | Flu + Thia  |                 |         | 3 |         | 3 |         | 3 |                  | 3 |         | 3 |

98

99

## 100 2.2 Thiacloprid application

101 For the application of thiacloprid we used the pure substance (98 % purity, Dr. Ehrenstorfer  
 102 GmbH), which was sonicated in pure water for a stock solution. We aimed to use a field-  
 103 realistic concentration that was approximately 100-fold lower than the oral LD<sub>50</sub> for  
 104 thiacloprid (173.2 mg/kg, Würfel, 2008). We therefore diluted thiacloprid in sucrose syrup  
 105 (Apiinvert, Südzucker GmbH) in order to receive the respective concentration. The final  
 106 solution was quantified by an external lab (Eurofins Dr. Specht Laboratorien GmbH,  
 107 Hamburg, Germany) which confirmed a thiacloprid concentration of 1.6 mg/kg (= 1,600 ppb).  
 108 This feeding solution was applied to the colonies of the specific treatment groups and control  
 109 colonies were fed with untreated sucrose syrup. The duration of the treatment in the year 2010  
 110 was 56 days (23<sup>rd</sup> Jul-17<sup>th</sup> Sep) and in the year 2011 62 days (21<sup>st</sup> Apr-22<sup>nd</sup> Jun) during  
 111 summer season. In this time period we fed 1 kg syrup per week with an internal feeding  
 112 device, to simulate a chronic exposure. A final amount of 8 kg per colony in 2010 and 9 kg in  
 113 2011 was administered in the summer season, respectively. Based on the concentration of  
 114 1.6 mg/kg we therefore applied a total amount of 12.8 mg thiacloprid per colony in 8 weeks  
 115 (2010) and 14.4 mg thiacloprid per colony in 9 weeks (2011) during the summer season,  
 116 respectively. The treatment was resumed when colonies were fed for overwintering at the end  
 117 of the season. Every colony was fed with approximately 15 kg of the feeding solution with a  
 118 total amount of 24.0 mg thiacloprid in each year for winter feeding. After the treatment period

119 in summer, a pooled sample of food (nectar/honey) from the combs was analyzed for residues  
120 at Eurofins Dr. Specht Laboratorien GmbH.

### 121 **2.3 $\tau$ -fluvalinate application**

122 Apistan<sup>®</sup> strips (Vita Europe Ltd, Basingstoke, UK) were used for the  $\tau$ -fluvalinate treatment.  
123 As recommended, one strip per box was applied to the  $\tau$ -fluvalinate treatment groups during  
124 the same time of the thiacloprid application. After the treatment period, a pooled sample of  
125 beeswax was analyzed for residues at our own lab in Hohenheim. During overwintering, the  
126 strips were again inserted to the colonies to resume a chronic treatment.

### 127 **2.4 Assessment of population dynamics**

128 The amount of bees and brood cells (open and sealed) were estimated with the Liebefelder  
129 Method (Imdorf et al., 1987), which is a feasible tool that provides accurate and reliable  
130 results at the colony level (measuring error +/- 10 %). Care was taken that all colonies were  
131 evaluated by the same person on all dates to minimize variation. Colony assessments were  
132 usually conducted in the morning before bee flight.

### 133 **2.5 *Varroa* winter treatment**

134 In order to monitor the level of mite infestation in the colonies and to measure the  
135 effectiveness of the  $\tau$ -fluvalinate treatment, we applied 3.5 % oxalic acid sugar solution to the  
136 bees in a brood free stage during late autumn or winter time (30<sup>th</sup> Nov in 2010 and 29<sup>th</sup> Dec in  
137 2011). In both years the temperature was below 3 °C for optimal application to a closely  
138 spaced bee cluster. Dead mites were counted approximately one week after the treatment with  
139 a sticky board, which was inserted at the same day of treatment, respectively.

### 140 **2.6 Statistical analysis**

141 The estimated number of bees and brood cells from both years were checked with a Shapiro-  
142 Wilk test for normal distribution ( $p > 0.05$ ). Therefore, a one-way ANOVA and a multiple  
143 comparison of the means with a post-hoc Bonferroni correction were performed on the four  
144 experimental groups, respectively ( $\alpha = 0.05$ ).

145 All tests were performed using WinSTAT (R. Fitch Software, Bad Krozingen).

146

## 147 **3 RESULTS**

### 148 **3.1 Overwintering success**

149 In both years, none of the colonies died until the start of wintering in October (Tab. 1). Taken  
150 both years together, a total of five of the 33 colonies died over winter. Two of the  
151 “Thiacloprid” group (N = 9), one of the “Flu+Thia” group (N = 8), two of the “Control”  
152 group (N = 8) and none of the “Fluvalinate” group (N = 8; Tab. 1).

### 153 **3.2 Population dynamics**

#### 154 **3.2.1 Experiment 1 (2010 - 2011)**

155 The population of bees and brood cells were estimated four times during the whole season  
156 (Tab. 1). The results are shown in Fig. 1a for the number of bees and in Fig. 1b for the  
157 number of brood cells. We compared the four treatment groups for each date of the estimates  
158 and could not see significant differences (ANOVA) for the number of bees in August 2010  
159 (“AUG”;  $p=0.254$ ), October 2010 (“OCT”;  $p=0.473$ ) and April 2011 (“APR”;  $p=0.388$ ).  
160 Likewise, no significant differences of the amount of brood cells were recorded in October  
161 2010 (“OCT”;  $p=0.590$ ) and April 2011 (“APR”;  $p=0.128$ ). However, in July the number of  
162 bees of the “Control” were significantly lower compared to “Fluvalinate” ( $p=0.029$ ,  
163 ANOVA). The number of brood cells of the “Control” was significantly lower compared to  
164 “Thiacloprid” and “Flu+Thia” in July ( $p=0.012$ , ANOVA) and compared to “Thiacloprid” in  
165 August ( $p=0.004$ , ANOVA).

166

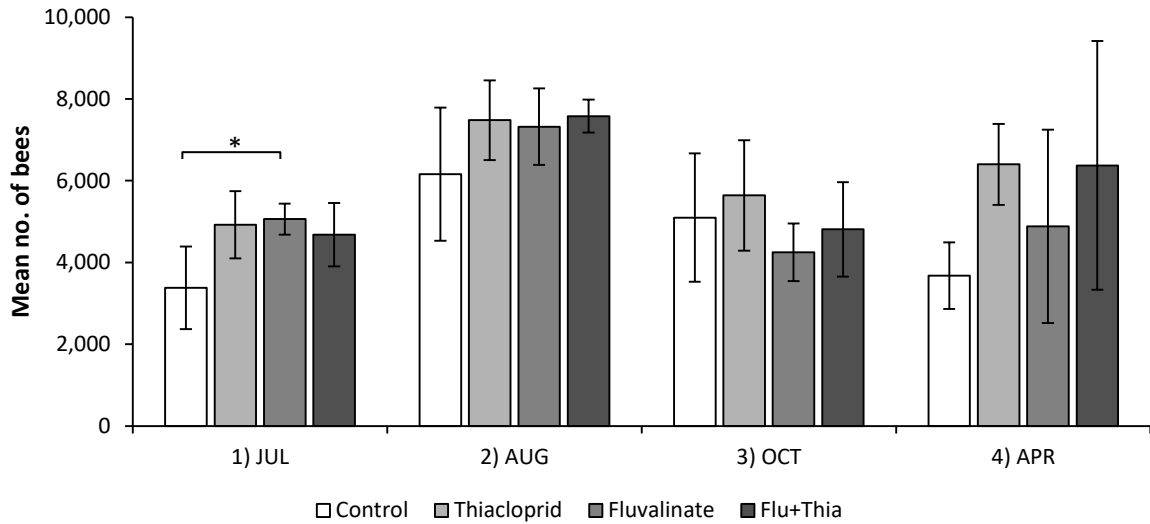

167

168 **Fig. 1a:** Number of bees estimated in the colonies in the year 2010-2011 for the four treatment groups at four  
169 different assessments. \* statistically significantly lower when “Control” compared to “Fluvalinate” ( $p < 0.05$ ,  
170 ANOVA).

171

172

173

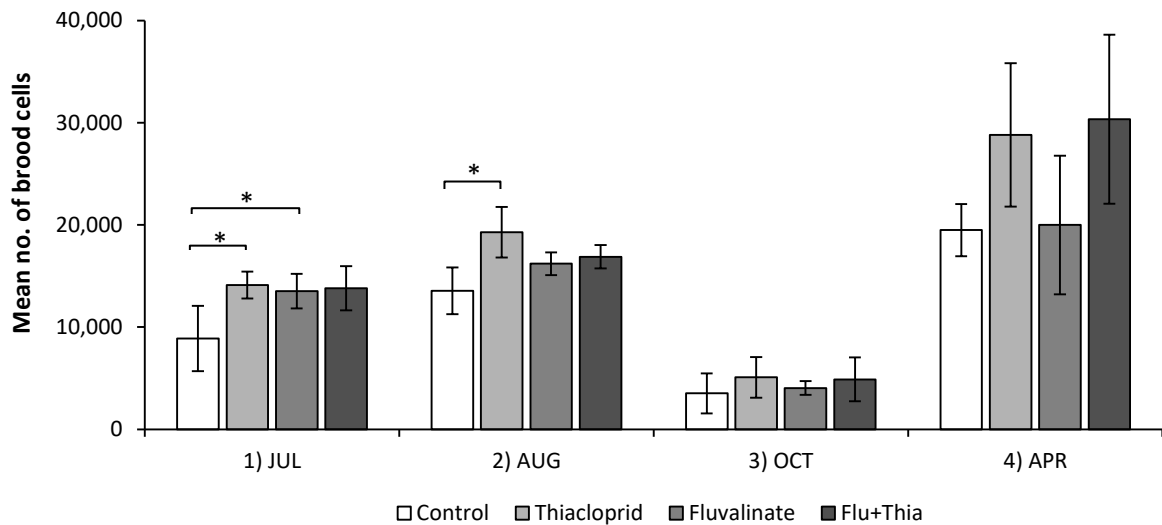

174

175 **Fig. 1b:** Number of brood cells estimated in the colonies in the year 2010-2011 for the four treatment groups at  
176 four different assessments. \* statistically significantly lower when “Control” compared to “Thiacloprid” and  
177 “Fluvalinate” ( $p < 0.05$ , ANOVA) in 1), and when “Control” compared to “Thiacloprid” ( $p < 0.05$ , ANOVA) in 2).

178

179 **3.2.2 Experiment 2 (2011 - 2012)**

180 For the replicate of experiment 1, also four assessments were performed throughout the  
181 season. The results are shown in Fig. 2a for bees and in Fig. 2b for brood. We again compared  
182 the four groups within each assessment but could not see any significant differences for the  
183 number of bees (April 2011  $p=0.174$ ; August 2011  $p=0.367$ ; October 2011  $p=0.664$ ; April  
184 2012  $p=0.198$ ) and no significant differences for the number of brood cells in April 2011  
185 ( $p=0.071$ ), October 2011 ( $p=0.328$ ) and April 2012 ( $p=0.176$ ; ANOVA). Solely, in August  
186 2011, the number of brood cells in “Thiacloprid” was significantly lower compared to  
187 “Control” and “Fluvalinate” ( $p=0.017$ , ANOVA).

188

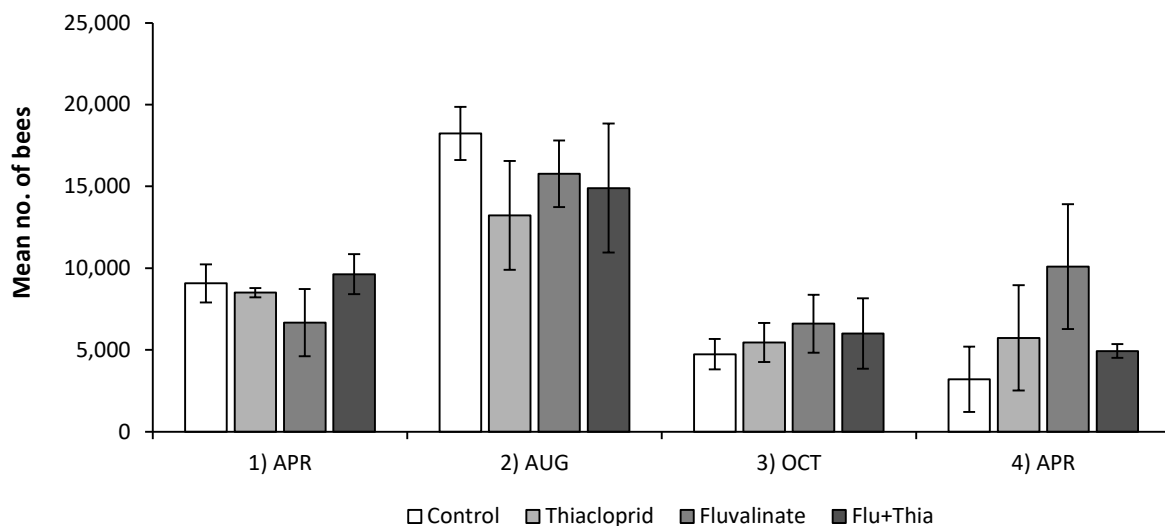

189

190 **Fig. 2a:** Number of bees estimated in the colonies in the year 2011-2012 for the four treatment groups at four  
191 different assessments. We could not see statistically significant differences within the assessments ( $p>0.05$ ,  
192 ANOVA).

193



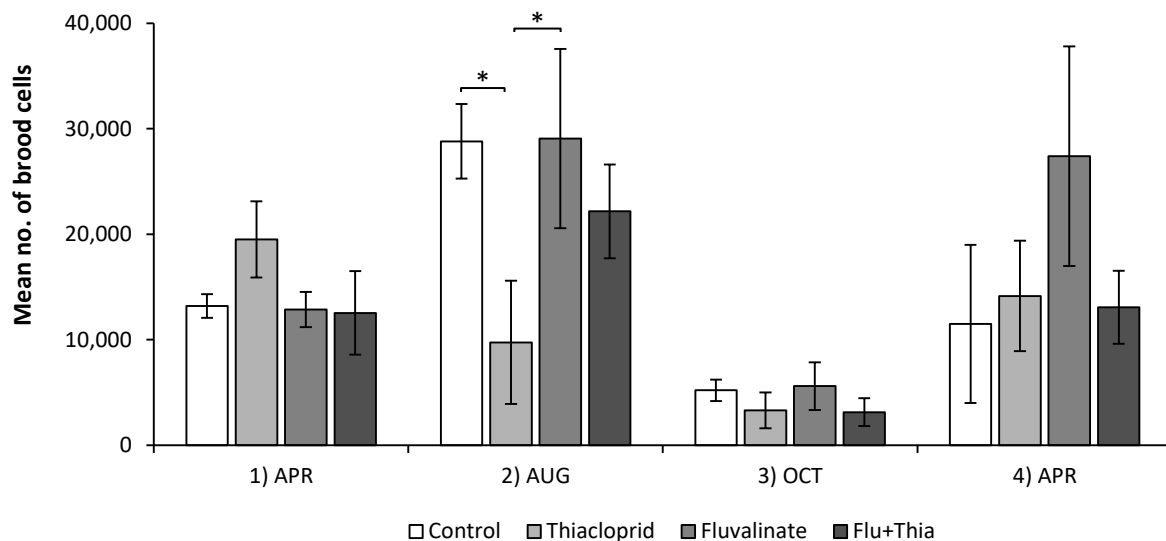

194

195 **Fig. 2b:** Number of brood cells estimated in the colonies in the year 2011-2012 for the four treatment groups at  
196 four different assessments. \* statistically significantly lower when “Thiocloprid” compared to “Control” and  
197 “Fluvalinate” ( $p < 0.05$ , ANOVA) in 2).

198

### 199 3.3 Thiocloprid residues

200 Food from the syrup feeding, which was processed by the bees and stored in honeycombs,  
201 was analyzed for thiacloprid residues in both years with QuEChERS method (Limit of  
202 Quantification LOQ = 0.01 mg/kg). For the analysis, samples from all colonies and the  
203 respective groups per year were pooled. All groups without thiacloprid treatment did not have  
204 measurable residues in both years. The pooled samples from the “Thiacloprid” and  
205 “Flu+Thia” groups had residues of 0.11 mg/kg and 0.20 mg/kg, respectively, in the year  
206 2010-2011 and 0.29 mg/kg and 0.19 mg/kg, respectively, in the year 2011-2012 (Tab. 2).

207

### 208 3.4 $\tau$ -fluvalinate residues

209 Beeswax was analyzed for  $\tau$ -fluvalinate residues in both years by solid-phase extraction (SPE)  
210 and GC-ECD (LOQ = 0.5 mg/kg). For the analysis, samples from all colonies and the  
211 respective groups per year were pooled. All groups without  $\tau$ -fluvalinate treatment did not  
212 have measurable residues in both years. Pooled samples from the “Fluvalinate” and  
213 “Flu+Thia” groups had residues of  $> 100$  mg/kg and 16.7 mg/kg, respectively, in the year  
214 2010-2011 and 14.3 mg/kg and 31.6 mg/kg, respectively, in the year 2011-2012 (Tab. 2).

215

216 **Tab. 2:** Thiacloprid residues in pooled food (syrup) samples, which was processed by the bees and stored in the  
 217 honeycombs from all treatment groups in both years (QuEChERS method, LOQ = 0.01 mg/kg).  $\tau$ -fluvalinate  
 218 residues in pooled beeswax samples from all treatment groups in both years (SPE & GC-ECD, LOQ = 0.5  
 219 mg/kg).

| Year          | Treatment     | Matrix | Thiacloprid [mg/kg] | Matrix  | $\tau$ -fluvalinate [mg/kg] |
|---------------|---------------|--------|---------------------|---------|-----------------------------|
| 2010-<br>2011 | Control       | Food   | 0                   | Beeswax | 0                           |
|               | Thiacloprid   |        | 0.11                |         | 0                           |
|               | Fluvalinate   |        | 0                   |         | > 100                       |
|               | Flu + Thia    |        | 0.2                 |         | 16.7                        |
| 2011-<br>2012 | Control       | Food   | 0                   | Beeswax | 0                           |
|               | Thiacloprid   |        | 0.29                |         | 0                           |
|               | Fluvalinate   |        | 0                   |         | 14.3                        |
|               | Flu + Thia    |        | 0.19                |         | 31.6                        |
|               | Feeding Syrup | Syrup  | 1.6                 | -       | -                           |

220

221

### 222 3.5 *Varroa* winter treatment

223 In both years, the winter treatment with oxalic acid killed considerably fewer mites in those  
 224 groups that have been continuously treated with the acaricide  $\tau$ -fluvalinate (Fig. 3). In the  
 225 “Control” and “Thiacloprid” groups between 217 to 409 mites were killed through this winter  
 226 treatment, on average. In 2010, only one single mite was found in the eight  $\tau$ -fluvalinate  
 227 treated colonies! However, in both  $\tau$ -fluvalinate treated groups the number of mites killed by  
 228 the winter treatment increased in the second year to an average of 15 mites for the  
 229 “Fluvalinate” group and 68 mites for the “Flu+Thia” group, respectively.

230

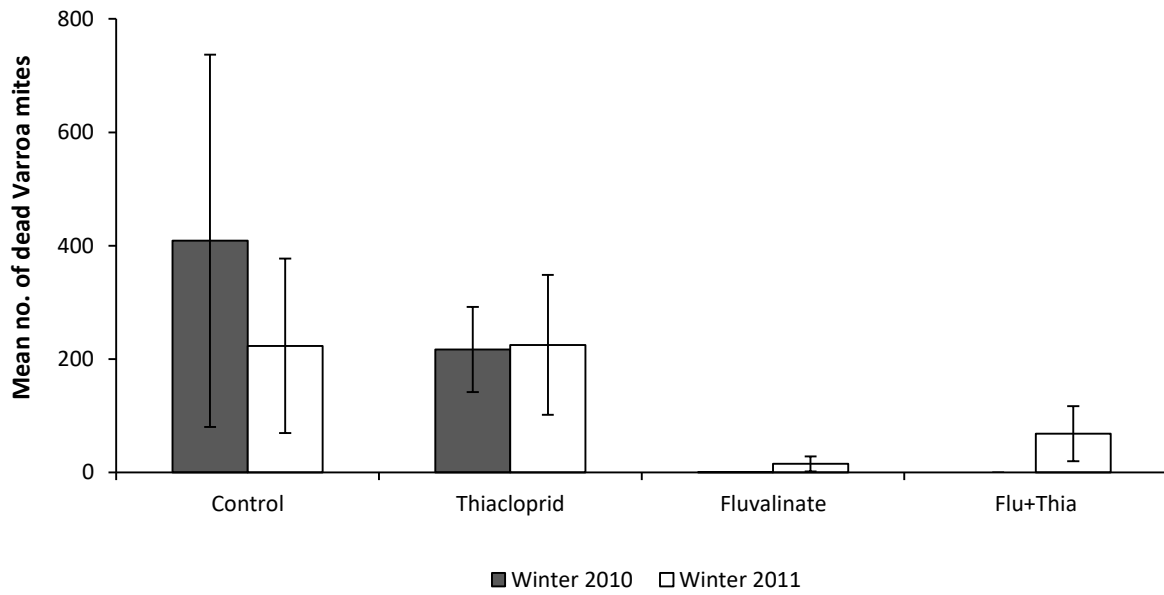

231

232 **Fig. 3:** Graph of the dropped *Varroa* mites approximately one week after oxalic acid treatment during winter  
233 time (2010 and 2011). In both years a considerably lower number of dead mites could be detected in the  $\tau$ -  
234 fluvalinate treated vs. the untreated groups.

235

## 236 4 DISCUSSION

237 We here analyzed the effects of two commonly used pesticides on the population dynamics  
238 and the overwintering success of free flying honey bee colonies. The pesticides belong to two  
239 different substance classes, one a neonicotinoid insecticide and the other a synthetic  
240 pyrethroid widely used as acaricide to combat varroa mites. For both, the insecticide and the  
241 acaricide, the applied dosages represent worst case scenarios. Thiacloprid is meanwhile  
242 frequently found as residue in pollen and honey, presumably due to the application in  
243 flowering oilseed rape and fruit production. Maximum peak concentrations of thiacloprid in  
244 bee products such as nectar, honey or pollen range from ~0.05 to 1 mg/kg across the globe  
245 (EFSA, 2016; Genersch et al., 2010; Laaniste et al., 2016; Mitchell et al., 2017; Mullin et al.,  
246 2012; Pohorecka et al., 2012; Smodis Skerl et al., 2009) but rarely exceed the average level of  
247 0.2 mg/kg (reports of the German Bee Monitoring, see Rosenkranz et al., 2016). It should be  
248 mentioned that 0.2 mg/kg is also the maximum value for thiacloprid residues accepted for  
249 honey in the EU (EFSA, 2016). The continuous long-term feeding of 1.6 mg/kg thiacloprid to  
250 our experimental colonies resulted indeed in residue levels of this magnitude ranging from  
251 about 0.1 to 0.3 mg/kg in the stored food. It is interesting to note the significant 8-fold-  
252 decrease from the concentration in the original feeding syrup to the honey bee processed  
253 syrup stored in the honeycombs. This decrease might be due to a dilution effect, as all  
254 colonies could forage and had access to various nectar sources. Furthermore, Iwasa et al.  
255 (2004) and Brunet et al. (2005) reported that cyano-substituted neonicotinoids such as  
256 thiacloprid and acetamiprid appear to be metabolized more quickly by the honey bee  
257 compared to nitro-substituted ones (i.e. imidacloprid, clothianidin). The enzyme that  
258 metabolizes thiacloprid very efficiently but lacking impact against imidacloprid was recently  
259 identified as a single cytochrome P450, CYP9Q3 (Manjon et al., 2018). As we did not analyze  
260 metabolites, this could additionally have contributed to decrease the in-hive concentration of  
261 the pesticide by bees processing the syrup.

262 For  $\tau$ -fluvalinate, likewise high maximum residue values are reported. Due to their lipophilic  
263 property residues are concentrated and accumulated within the beeswax and can exceed 15  
264 mg/kg (Berry et al., 2013) which is in the range of  $\tau$ -fluvalinate residues in our experimental  
265 colonies after long-term treatment with Apistan<sup>®</sup> strips. Bogdanov et al. (1998) confirmed an  
266 increase of residues with the duration of the strip exposition with a plateau of about 40 to 60  
267 mg/kg after six months whereas other authors found values between 6.6 and 200 mg/kg  
268 (Mullin et al., 2010; Adamczyk et al., 2010; Tsigouri et al., 2004).

269 However, even these residue levels of thiacloprid and  $\tau$ -fluvalinate are considered to have no  
270 acute toxicity to bees or brood (Iwasa et al., 2004; Sanchez-Bayo and Goka, 2014). In our  
271 worst case approach we examined whether a long-term exposure to field-realistic peak  
272 concentrations of the two pesticides - applied alone or in combination - impairs the  
273 development of honey bee colonies under field conditions. In two approaches performed in  
274 two consecutive years and using an identical experimental setup we could not detect any  
275 negative impact of the treatments on the population of bees and brood and on the  
276 overwintering of the colonies. Our moderate overwintering losses of about 15 % (20 % in the  
277 first and 8 % in the second winter) are within the range of common winter losses in free flying  
278 colonies in Germany and United States (Genersch et al., 2010; Lee et al., 2015) and affected  
279 all except the “Fluvalinate” group. Probably, the higher mite load in the untreated groups has  
280 contributed to these slightly higher overwintering losses. The mite infestation was quantified  
281 in late autumn/winter by an oxalic acid treatment which is known to be highly effective  
282 against *Varroa* mites, given that bees are in their winter cluster without brood (Rademacher  
283 and Harz, 2006). With the treatment we could also verify that the colonies treated with  $\tau$ -  
284 fluvalinate were sufficiently exposed to this compound during the season, resulting in lower  
285 dead mite drops compared to the two groups not treated with  $\tau$ -fluvalinate. Remarkably, in the  
286 winter treatment of the second season our colonies already showed signs of an established  $\tau$ -  
287 fluvalinate resistance in the *Varroa* mite population at our apiary. Such resistance was often  
288 reported in the past all over the world (Lodesani et al., 1995; Elzen et al., 1999; Gracia-  
289 Salinas et al., 2006; Alissandrakis et al., 2017).

290 In both years the population of bees and brood was evaluated eight times in a total of 8 - 9  
291 colonies per treatment group. Only in very few cases significant group differences were  
292 recorded. In the first year (2010/2011), the control colonies were slightly weaker at the start of  
293 the experiment in spring/summer but revealed no differences any more in the autumn and  
294 after-winter evaluations. Although all experimental colonies were established from artificial  
295 swarms of approximately the same weight it is not unusual that there are small differences in  
296 the first weeks of development in newly established honey bee colonies (Imdorf et al., 2008).  
297 In the second year (2011/2012) the “Thiacloprid” group had a significant lower number of  
298 brood cells in August, however without differences in the two consecutive assessments and  
299 without significant effects on the adult bee population. More importantly, there were no group  
300 differences at all in the assessments before and after overwintering, indicating no effects of  
301 the pesticide treatment on this crucial colony performance. In a previous study performed in  
302 observation hives we could already confirm that behavioral traits like flight activity,

303 antennation, grooming and trophallaxis are not affected by the chronic exposure to high  
304 concentrations (1 mg/kg) of thiacloprid (Retschnig et al., 2015). The authors therefore  
305 assumed a rather weak impact of the pesticide treatment.

306 Our results are also in agreement with a three-year study of Siede et al. (2017) who  
307 chronically applied two different thiacloprid concentrations (0.2 mg/kg and 2 mg/kg) and  
308 could also not confirm any negative impairment on colony health and winter survival.  
309 Interestingly, they also found a significant lower amount of brood cells in colonies fed with  
310 the high thiacloprid concentration but equally to our results no effect on the colony strength or  
311 overwintering was noticed. In contrast to other neonicotinoids (Blacquiere et al., 2012) there  
312 has been no prove of acute toxicity of thiacloprid to brood; however, according to our results  
313 and those of Siede at al. (2017) this aspect should be considered in future approaches. Berry et  
314 al., (2013) could also show for  $\tau$ -fluvialinate, that exposure to high concentrations in beeswax  
315 did not have measurable effects on the amount of brood, amount of honey, foraging rate, time  
316 required for marked bees released to return to their hive, percentage of released bees that  
317 return to the hive, and colony *Nosema* spore loads. In addition, we here could prove for the  
318 first time that a combination of this acaricide with the neonicotinoid insecticide did not have  
319 measurable synergistic effects at the colony level.

320 However, our study is in contrast to many laboratory and semi-field studies providing  
321 evidence for negative effects of thiacloprid such as elevated mortality under stress (Doublet et  
322 al., 2015) or in combination with pathogens (Vidau et al., 2011), impaired navigation (Fischer  
323 et al., 2014), reduced immunocompetence (Brandt et al., 2016), disrupted learning and  
324 memory functions (Tison et al., 2017) as well as affected social behavior (Forfert and Moritz  
325 2017; Tison et al., 2016). In most of these studies individual bees were exposed to different  
326 concentrations of thiacloprid over a certain time period and subsequently challenged to  
327 various physiological tests. The findings were then extrapolated to the colony level without  
328 confirmation under field conditions. For example, Tison et al. (2016) found foraging behavior  
329 and social communication impaired when applying a concentration of 4.5 mg/kg thiacloprid  
330 over one week in a free flying feeder experiment. This exposure corresponds to a 23-fold  
331 higher concentration than the maximum value for thiacloprid residues accepted for honey in  
332 the EU (0.2 mg/kg; EFSA, 2016). It seems unlikely that honey bees are chronically exposed  
333 to such high concentrations under realistic field conditions. Additionally, it makes a  
334 difference whether pesticides are applied to individual bees under artificial conditions or to  
335 bees within a free flying colony. Obviously, the damage threshold of the honey bee colony as

336 a huge social entity is different from the threshold calculated from the effects on individual  
337 bees. This “buffering effect” of the colony has frequently been discussed, however without a  
338 final explanation of the underlying mechanisms (Straub et al., 2015; Sponsler and Johnson,  
339 2017). Recently, Odemer et al. (2018) could demonstrate that even the highly bee toxic  
340 neonicotinoid clothianidin is significantly less toxic when applied to bees that are kept within  
341 the social environment of a colony.

342 Our results might contribute to the current discussion about the ban of neonicotinoids in  
343 agricultural practice which recently led to an assessment of the EFSA considering three  
344 neonicotinoids (clothianidin, thiametoxam and imidacloprid) a “risk to bees” (EFSA, 2018). It  
345 is an important issue for the agricultural production and for environmental protection, whether  
346 neonicotinoids with substantially lower bee toxicity should also be banned. Our results  
347 indicate that at least for honey bees the risk is low. It is likely that wild bees or other  
348 pollinating insects are more susceptible to thiacloprid as it has been shown already for bumble  
349 bees (Ellis et al., 2017), however more field data on the population level of wild pollinators  
350 are necessary for a reliable risk assessment of thiacloprid.

351

352

353

354

355

## 356 **Disclosure statement**

357 No potential conflict of interest was reported by the authors.

358

359        **REFERENCES**

- 360        Adamczyk S, Lázaro R, Pérez-Arquillué C, Bayarri S, Herrera A (2010) Impact of the use of  
361        fluvalinate on different types of beeswax from Spanish hives. *Arch Environ Contam*  
362        *Toxicol* 58:733–739. doi: 10.1007/s00244-009-9387-7
- 363        Alaux C, Brunet FR JL, Dussaubat C, Mondet F, Tchamitchan S, Cousin M, Brillard J, Baldy  
364        A, Belzunces LP, Le Conte Y (2010) Interactions between *Nosema* microspores and a  
365        neonicotinoid weaken honeybees (*Apis mellifera*). *Environ Microbiol* 12:774–782. doi:  
366        10.1111/j.1462-2920.2009.02123.x
- 367        Alissandrakis E, Ilias A, Tsagkarakou A (2017) Pyrethroid target site resistance in Greek  
368        populations of the honey bee parasite *Varroa destructor* (Acari: Varroidae). *J Apic Res*  
369        56:625–630. doi: 10.1080/00218839.2017.1368822
- 370        Berry JA, Hood WM, Pietravalle S, Delaplane KS (2013) Field-Level Sublethal Effects of  
371        Approved Bee Hive Chemicals on Honey Bees (*Apis mellifera* L). *PLoS One*. doi:  
372        10.1371/journal.pone.0076536
- 373        Blacquièrè T, Smagghe G, Van Gestel CAM, Mommaerts V (2012) Neonicotinoids in bees: A  
374        review on concentrations, side-effects and risk assessment. *Ecotoxicology* 21:973–992.  
375        doi: 10.1007/s10646-012-0863-x
- 376        Bogdanov S, Kilchenmann V, Imdorf A (1998) Acaricide residues in some bee products. *J*  
377        *Apic Res* 37:57–67. doi: 10.1080/00218839.1998.11100956
- 378        Brandt A, Gorenflo A, Siede R, Meixner M, Büchler R, B??chler R (2016) The  
379        neonicotinoids thiacloprid, imidacloprid, and clothianidin affect the immunocompetence  
380        of honey bees (*Apis mellifera* L.). *J Insect Physiol* 86:40–47. doi:  
381        10.1016/j.jinsphys.2016.01.001
- 382        Brunet J-L, Badiou A, Belzunces LP (2005) In vivo metabolic fate of [14C]-acetamiprid in  
383        six biological compartments of the honeybee, *Apis mellifera* L. *Pest Manag Sci* 61:742–  
384        748. doi: 10.1002/ps.1046
- 385        Carreck NL (2017) A beekeeper’s perspective on the neonicotinoid ban. *Pest Manag Sci*  
386        73:1295–1298. doi: 10.1002/ps.4489
- 387        Cornman RS, Tarpy DR, Chen Y, Jeffreys L, Lopez D, Pettis JS, VanEngelsdorp D, Evans JD  
388        (2012) Pathogen Webs in Collapsing Honey Bee Colonies. *PLoS One* 7:e43562. doi:  
389        10.1371/journal.pone.0043562
- 390        Doublet V, Labarussias M, de Miranda JR, Moritz RFA, Paxton RJ (2015) Bees under stress:  
391        Sublethal doses of a neonicotinoid pesticide and pathogens interact to elevate honey bee  
392        mortality across the life cycle. *Environ Microbiol* 17:969–983. doi: 10.1111/1462-  
393        2920.12426

394



- 395 EFSA (2013) COMMISSION IMPLEMENTING REGULATION (EU) No 485/2013 of 24  
396 May 2013 amending Implementing Regulation (EU) No 540/2011, as regards the  
397 conditions of approval of the active substances clothianidin, thiamethoxam and  
398 imidacloprid, and prohibiting the use and s. Off J Eur Union L 139:12–26.
- 399 EFSA (2016) Modification of the existing maximum residue level for thiacloprid in honey.  
400 EFSA J 14:1–21. doi: 10.2903/j.efsa.2016.4418
- 401 EFSA (2018) Evaluation of the data on clothianidin, imidacloprid and thiamethoxam for the  
402 updated risk assessment to bees for seed treatments and granules in the EU. EFSA  
403 Support Publ 15:1–31. doi: 10.2903/sp.efsa.2018.EN-1378
- 404 Ellis C, Park KJ, Whitehorn P, David A, Goulson D (2017) The Neonicotinoid Insecticide  
405 Thiacloprid Impacts upon Bumblebee Colony Development under Field Conditions.  
406 Environ Sci Technol 51:1727–1732. doi: 10.1021/acs.est.6b04791
- 407 Elzen P, Eischen F, Baxter J, Elzen G, Wilson W (1999) Detection of resistance in US *Varroa*  
408 *jacobsoni* Oud.(Mesostigmata: Varroidae) to the acaricide fluvalinate. *Apidologie* 30:13–  
409 17. doi: doi.org/10.1051/apido:19990102
- 410 Fischer J, Müller T, Spatz A-K, Greggers U, Grünewald B, Menzel R (2014) Neonicotinoids  
411 interfere with specific components of navigation in honeybees. *PLoS One* 9:e91364. doi:  
412 10.1371/journal.pone.0091364
- 413 Forfert N, Moritz RFA (2017) Thiacloprid alters social interactions among honey bee workers  
414 (*Apis mellifera*). *J Apic Res* 56:467–474. doi: 10.1080/00218839.2017.1332542
- 415 Garrido PM, Porrini MP, Antúnez K, Branchiccela B, Martínez-Noël GMA, Zunino P,  
416 Salerno G, Eguaras MJ, Ieno E (2016) Sublethal effects of acaricides and *Nosema*  
417 *ceranae* infection on immune related gene expression in honeybees. *Vet Res* 47:51. doi:  
418 10.1186/s13567-016-0335-z
- 419 Genersch E, Von Der Ohe W, Kaatz H, Schroeder a, Otten C, Büchler R, Berg S, Ritter W,  
420 Mühlen W, Gisder S, Meixner M, Liebig G, Rosenkranz P (2010) The German bee  
421 monitoring project: A long term study to understand periodically high winter losses of  
422 honey bee colonies. *Apidologie* 41:332–352. doi: 10.1051/apido/2010014
- 423 Gracia-Salinas MJ, Ferrer-Dufol M, Latorre-Castro E, Monero-Manera C, Castillo-Hernández  
424 J, Lucientes-Curd J, Peribáñez-López MA (2006) Detection of fluvalinate resistance in  
425 *Varroa destructor* in Spanish apiaries. *J Apic Res* 45:101–105. doi:  
426 10.1080/00218839.2006.11101326
- 427 Henry M, Beguin M, Requier F, Rollin O, Odoux J-F, Aupinel P, Aptel J, Tchamitchian S,  
428 Decourtye A (2012) A Common Pesticide Decreases Foraging Success and Survival in  
429 Honey Bees. *Science* (80-) 336:348–350. doi: 10.1126/science.1215039
- 430 Imdorf A, Buehlmann G, Gerig L, Kilchenmann V (1987) Überprüfung der Schätzmethode  
431 zur Ermittlung der Brutfläche und der Anzahl Arbeiterinnen in freifliegenden  
432 Bienenvölkern. *Apidologie* 18:137–146. doi: <http://dx.doi.org/10.1051/apido:19870204>

- 433 Imdorf A, Ruoff K, Fluri P (2008) Volkswirtschaft bei der Honigbiene. ALP forum, (68),  
434 2008, 1-88. ISSN Print: 1661-0814
- 435 Iwasa T, Motoyama N, Ambrose JT, Roe RM (2004) Mechanism for the differential toxicity  
436 of neonicotinoid insecticides in the honey bee, *Apis mellifera*. *Crop Prot* 23:371–378.  
437 doi: 10.1016/j.cropro.2003.08.018
- 438 Jeschke P, Nauen R, Schindler M, Elbert A (2011) Overview of the status and global strategy  
439 for neonicotinoids. *J Agric Food Chem* 59:2897–908. doi: 10.1021/jf101303g
- 440 Laaniste A, Leito I, Rebane R, Lõhmus R, Lõhmus A, Punga F, Kruse A (2016)  
441 Determination of neonicotinoids in Estonian honey by liquid chromatography–  
442 electrospray mass spectrometry. *J Environ Sci Heal Part B* 51:455–464. doi:  
443 10.1080/03601234.2016.1159457
- 444 Lee K V., Steinhauer N, Rennich K, Wilson ME, Tarpy DR, Caron DM, Rose R, Delaplane  
445 KS, Baylis K, Lengerich EJ, Pettis J, Skinner JA, Wilkes JT, Sagili R, VanEngelsdorp D  
446 (2015) A national survey of managed honey bee 2013–2014 annual colony losses in the  
447 USA. *Apidologie* 46:292–305. doi: 10.1007/s13592-015-0356-z
- 448 Lodesani M, Colombo M, Spreafico M (1995) Ineffectiveness of Apistan® treatment against  
449 the mite *Varroa jacobsoni* Oud in several districts of Lombardy (Italy). *Apidologie*  
450 26:67–72. doi: doi.org/10.1051/apido:19950109
- 451 Manjon C, Troczka BJ, Zaworra M, Beadle K, Randall E, Hertlein G, Singh KS, Zimmer CT,  
452 Homem RA, Lueke B, Reid R, Kor L, Kohler M, Benting J, Williamson MS, Davies  
453 TGE, Field LM, Bass C, Nauen R (2018) Unravelling the Molecular Determinants of  
454 Bee Sensitivity to Neonicotinoid Insecticides. *Curr Biol* 1–7. doi:  
455 10.1016/j.cub.2018.02.045
- 456 Matsumoto T (2013) Reduction in homing flights in the honey bee *Apis mellifera* after a  
457 sublethal dose of neonicotinoid insecticides. *Bull Insectology* 66:1–9.
- 458 Mitchell EAD, Mulhauser B, Mulot M, Mutabazi A, Glauser G, Aebi A (2017) A worldwide  
459 survey of neonicotinoids in honey. *Science* (80- ) 358:109–111. doi:  
460 10.1126/science.aan3684
- 461 Mullin C a, Frazier M, Frazier JL, Ashcraft S, Simonds R, Vanengelsdorp D, Pettis JS (2010)  
462 High levels of miticides and agrochemicals in North American apiaries: implications for  
463 honey bee health. *PLoS One* 5:e9754. doi: 10.1371/journal.pone.0009754
- 464 Odemer R, Nilles L, Linder N, Rosenkranz P (2018) Sublethal effects of clothianidin and  
465 *Nosema* spp. on the longevity and foraging activity of free flying honey bees.  
466 *Ecotoxicology*. doi: 10.1007/s10646-018-1925-5
- 467 Pettis JS, Vanengelsdorp D, Johnson J, Dively G (2012) Pesticide exposure in honey bees  
468 results in increased levels of the gut pathogen *Nosema*. *Naturwissenschaften* 99:153–  
469 158. doi: 10.1007/s00114-011-0881-1
- 470

- 471 Pohorecka K, Skubida P, Miszczak A, Semkiw P, Sikorski P, Zagibajło K, Teper D,  
472 Kołtowski Z, Skubida M, Zdańska D, Bober A (2012) Residues of Neonicotinoid  
473 Insecticides in Bee Collected Plant Materials from Oilseed Rape Crops and their Effect  
474 on Bee Colonies. *J Apic Sci* 56:115–134. doi: 10.2478/v10289-012-0029-3
- 475 Rademacher E, Harz M (2006) Oxalic acid for the control of varroosis in honey bee colonies  
476 – a review. *Apidologie* 37:98–120. doi: 10.1051/apido:2005063
- 477 Retschnig G, Williams GR, Odemer R, Boltin J, Di Poto C, Mehmman MM, Retschnig P,  
478 Winiger P, Rosenkranz P, Neumann P (2015) Effects, but no interactions, of ubiquitous  
479 pesticide and parasite stressors on honey bee (*Apis mellifera*) lifespan and behaviour in  
480 a colony environment. *Environ Microbiol* 17:4322–4331. doi: 10.1111/1462-2920.12825
- 481 Rosenkranz P, Aumeier P, Ziegelmann B (2010) Biology and control of *Varroa destructor*. *J*  
482 *Invertebr Pathol* 103 Suppl:S96-119. doi: 10.1016/j.jip.2009.07.016
- 483 Rosenkranz P, von der Ohe W, Schäfer M, Genersch E, Büchler R, Berg S, Otten C (2016)  
484 Veröffentlichungen und Berichte Website Deutsches Bienenmonitoring - „DeBiMo“.  
485 <https://goo.gl/JBj8LC>, Accessed 18 March 2018
- 486 Sanchez-Bayo F, Goka K (2014) Pesticide Residues and Bees – A Risk Assessment. *PLoS*  
487 *One* 9:e94482. doi: 10.1371/journal.pone.0094482
- 488 Schmuck R, Stadler T, Schmidt H-W (2003) Field relevance of a synergistic effect observed  
489 in the laboratory between an EBI fungicide and a chloronicotiny insecticide in the  
490 honeybee (*Apis mellifera* L, Hymenoptera). *Pest Manag Sci* 59:279–86. doi:  
491 10.1002/ps.626
- 492 Siede R, Faust L, Meixner MD, Maus C, Grünewald B, Büchler R (2017) Performance of  
493 honey bee colonies under a long-lasting dietary exposure to sublethal concentrations of  
494 the neonicotinoid insecticide thiacloprid. *Pest Manag Sci* 73:1334–1344. doi:  
495 10.1002/ps.4547
- 496 Smodis Skerl MI, Velikonja Bolta S, Basa Cesnik H, Gregorc A (2009) Residues of  
497 Pesticides in honeybee (*Apis mellifera carnica*) bee bread and in pollen loads from  
498 treated apple orchards. *Bull Environ Contam Toxicol* 83:374–7. doi: 10.1007/s00128-  
499 009-9762-0
- 500 Straub L, Williams GR, Pettis J, Fries I, Neumann P (2015) Superorganism resilience:  
501 eusociality and susceptibility of ecosystem service providing insects to stressors. *Curr*  
502 *Opin Insect Sci* 12:109–112. doi: 10.1016/j.cois.2015.10.010
- 503 Sponsler DB, Johnson RM (2017) Mechanistic modeling of pesticide exposure: The missing  
504 keystone of honey bee toxicology. *Environ Toxicol Chem* 36:871–881. doi:  
505 10.1002/etc.3661
- 506 Tison L, Hahn M-L, Holtz S, Rößner A, Greggers U, Bischoff G, Menzel R (2016) Honey  
507 Bees' Behavior Is Impaired by Chronic Exposure to the Neonicotinoid Thiacloprid in the  
508 Field. *Environ Sci Technol* 50:7218–7227. doi: 10.1021/acs.est.6b02658

- 509 Tison L, Holtz S, Adeoye A, Kalkan Ö, Irmisch NS, Lehmann N, Menzel R (2017) Effects of  
510 sublethal doses of thiacloprid and its formulation Calypso ® on the learning and memory  
511 performance of honey bees. *J Exp Biol* 220:3695–3705. doi: 10.1242/jeb.154518
- 512 Tsigouri AD, Menkissoglu-Spiroudi U, Thrasyvoulou A, Diamantidis G (2004) Fluvalinate  
513 Residues in Honey and Beeswax after Different Colony Treatments. *Bull Environ*  
514 *Contam Toxicol* 72:975–982. doi: 10.1007/s00128-004-0339-7
- 515 Vidau C, Diogon M, Aufauvre J, Fontbonne R, Viguès B, Brunet JL, Texier C, Biron DG,  
516 Blot N, Alaoui H, Belzunces LP, Delbac F (2011) Exposure to sublethal doses of fipronil  
517 and thiacloprid highly increases mortality of honeybees previously infected by nosema  
518 ceranae. *PLoS One* 6:e21550. doi: 10.1371/journal.pone.0021550
- 519 Wallner K (1999) Varroacides and their residues in bee products. *Apidologie* 30:235–248.  
520 doi: doi.org/10.1051/apido:19990212
- 521 Wang R, Liu Z, Dong K, Elzen PJ, Pettis J, Huang Z (2002) Association of novel mutations in  
522 a sodium channel gene with fluvalinate resistance in the mite, *Varroa destructor*. *J Apic*  
523 *Res* 41:17–25. doi: 10.1080/00218839.2002.11101064
- 524 Watkins M (1997) Resistance and its relevance to beekeeping. *Bee World* 78:15–22. doi:  
525 10.1080/0005772X.1997.11099327
- 526 Wu JY, Smart MD, Anelli CM, Sheppard WS (2012) Honey bees (*Apis mellifera*) reared in  
527 brood combs containing high levels of pesticide residues exhibit increased susceptibility  
528 to *Nosema* (Microsporidia) infection. *J Invertebr Pathol* 109:326–9. doi:  
529 10.1016/j.jip.2012.01.005
- 530 Würfel T (2008) Abschlussbericht Beizung und Bienenschäden. Minist für Ernährung und  
531 ländlichen Raum 1–40. <https://goo.gl/LMuN5g>, Accessed 10 December 2017
- 532
